# Supplementary material
Source: Research Square preprint supplement (doi:10.21203/rs.3.rs-8986183/v1)
Supplement: Supplementary file 1 [file 72bab760f990a4bc36a58b17.docx]

**SO3H supported on NiFe2O4@SiO2-AP nanoparticles as an efficient and heterogeneous reusable catalyst for synthesis of pyridine derivatives**

**
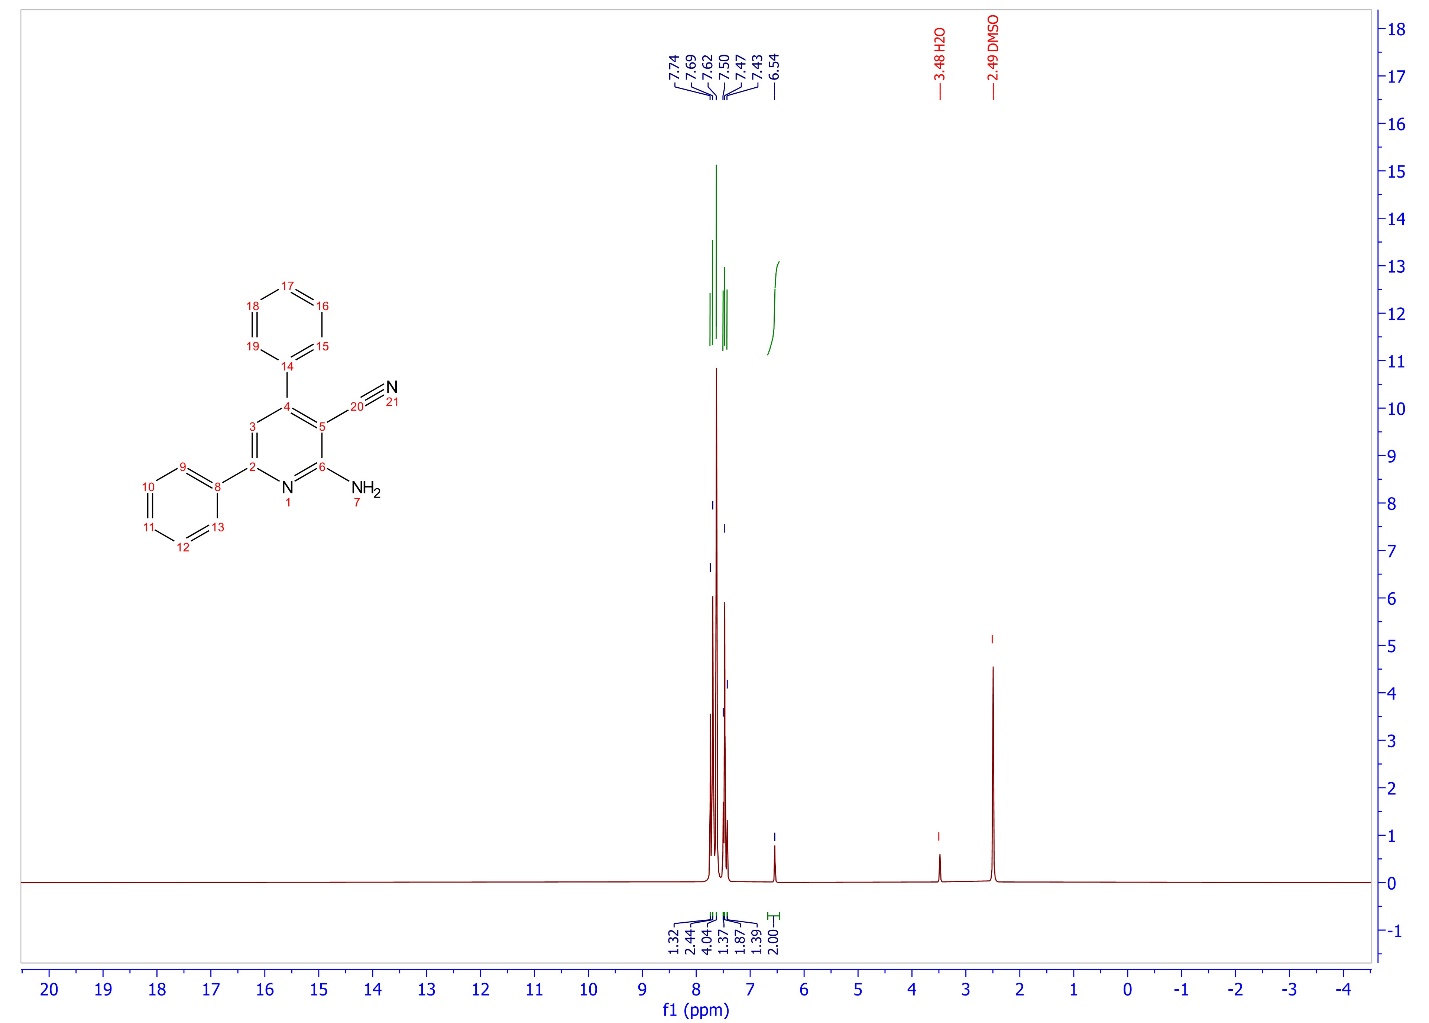
**

**Figure S1)** 2-amino-4,6-diphenylnicotinonitrile

**2-Amino-4,6-diphenylnicotinonitrile**:1H NMR (DMSO, 400 MHz): δ= 7.7 (m, 1H), 7.6 (m, 2H), 7.6 (m, 4H), 7.5 (m, 1H), 7.4 (m, 2H), 7.4(s, 1H), 6.5 (m, 2H) ppm.


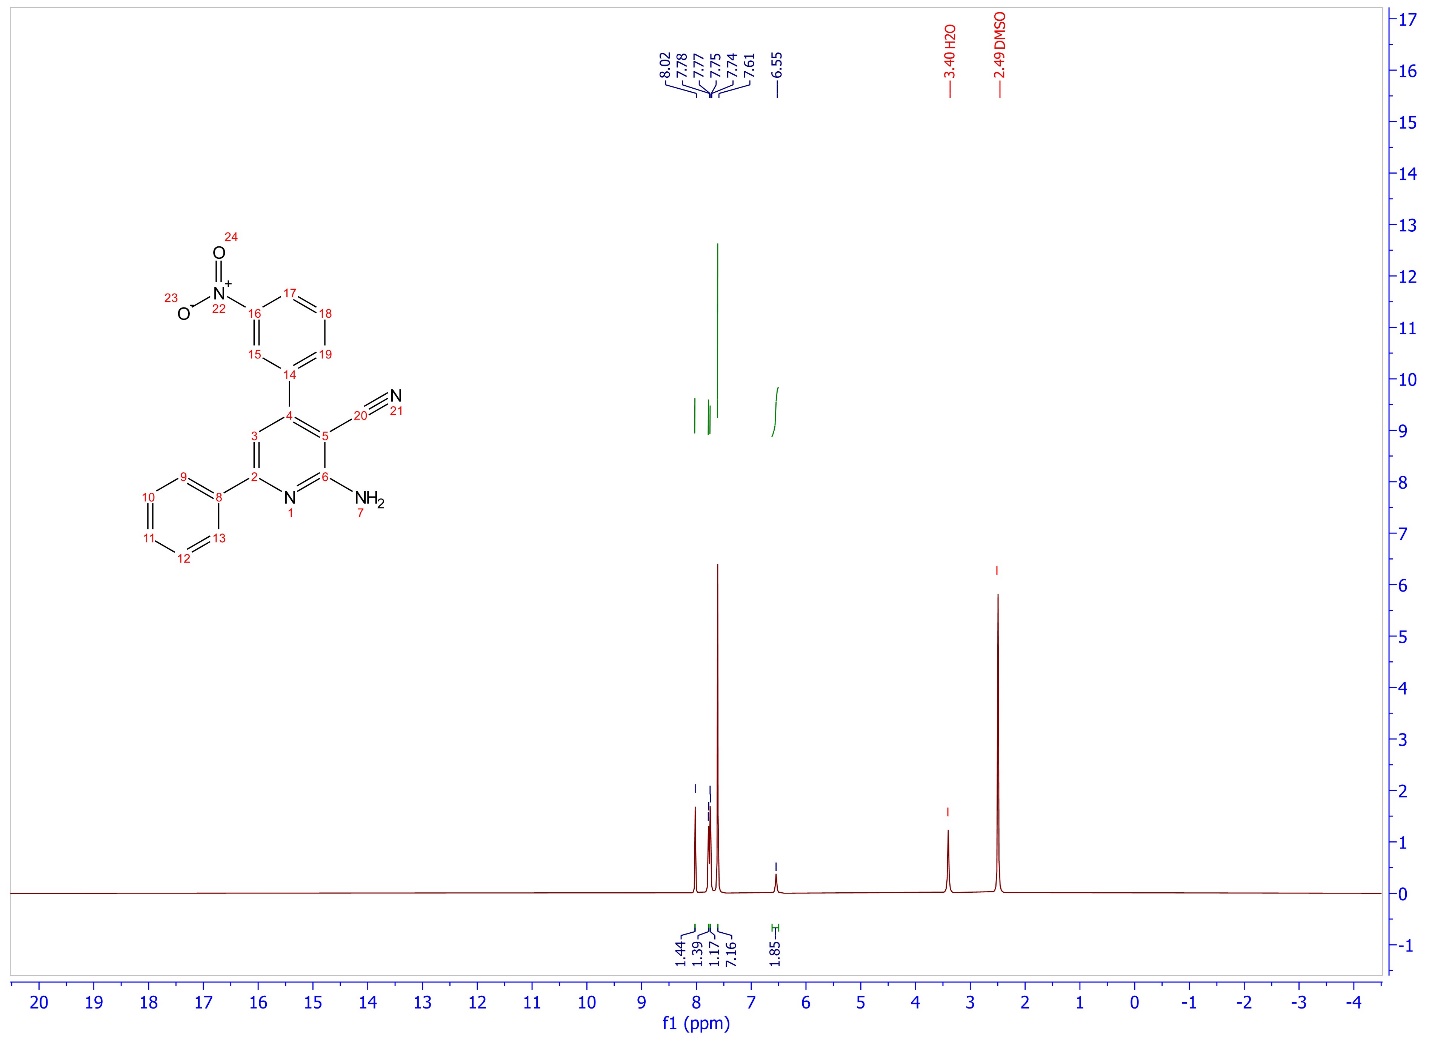


**Figure S2)** 2-amino-4-(3-nitrophenyl)-6-phenylnicotinonitrile

**2-Amino-4-(3-nitrophenyl)-6-phenylnicotinonitrile**:1H NMR (DMSO, 400 MHz): δ= 8.0 (s, 1H), 7.7 (m, 1H), 7.7 (m, 1H), 7.6 (m, 7H), 6.5 (m, 2H) ppm.


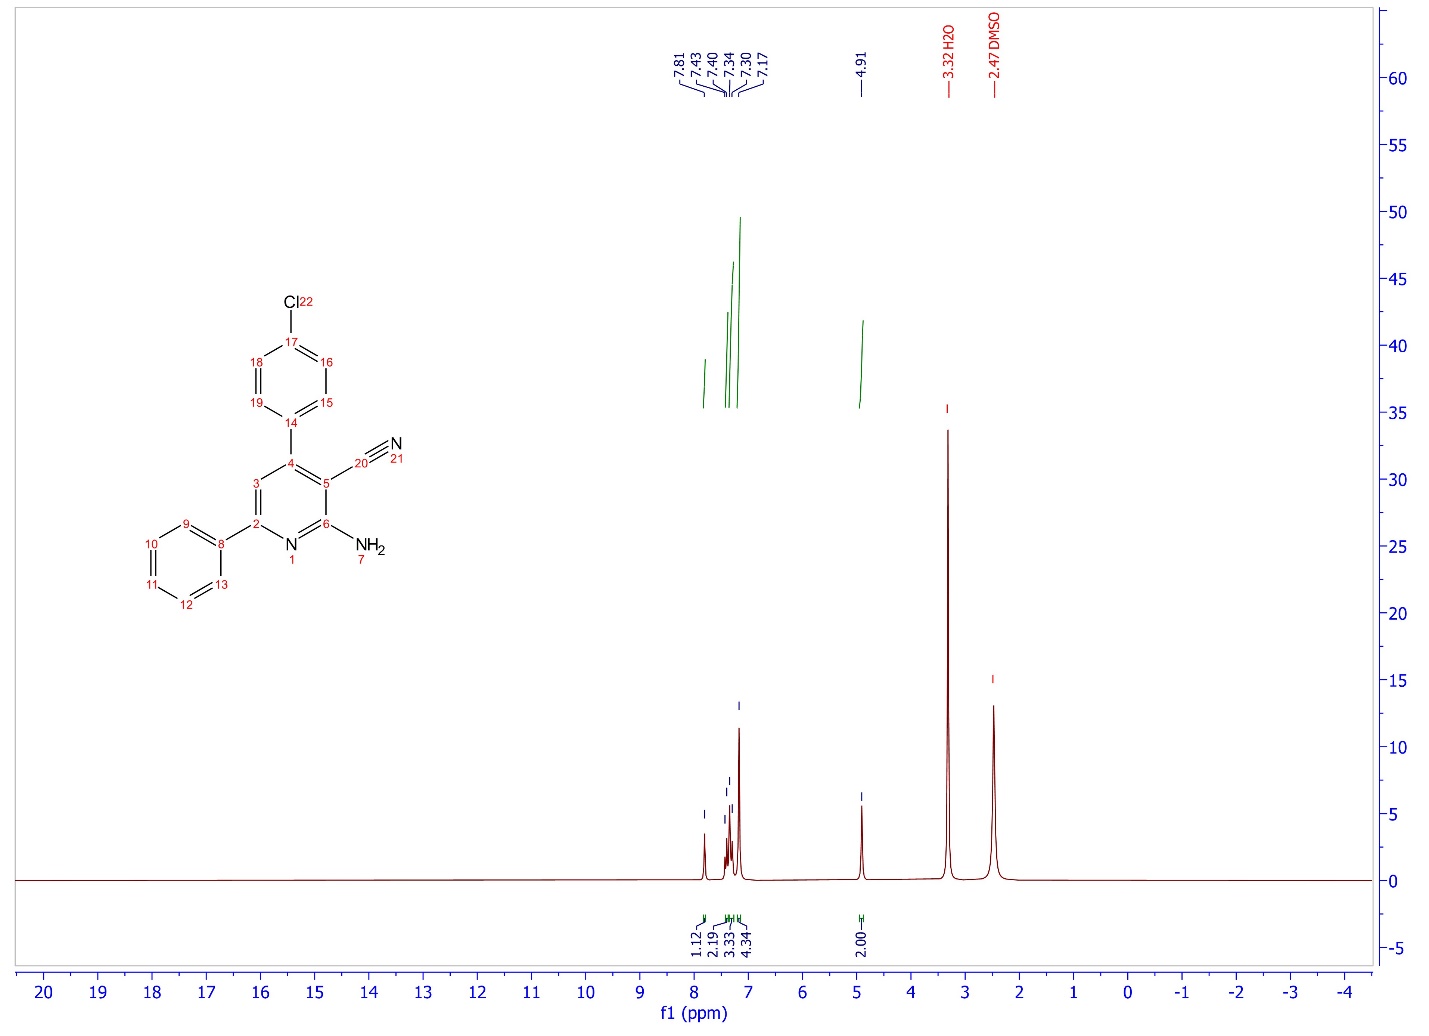


**Figure S3)** 2-amino-4-(4-chlorophenyl)-6-phenylnicotinonitrile

**2-Amino-4-(4-chlorophenyl)-6-phenylnicotinonitrile**:1H NMR (DMSO, 400 MHz): δ= 8.0 (s, 1H), 7.4 (m, 2H), 7.3 (m, 3H), 7.1 (m, 4H), 4.9 (s, 2H) ppm.

**
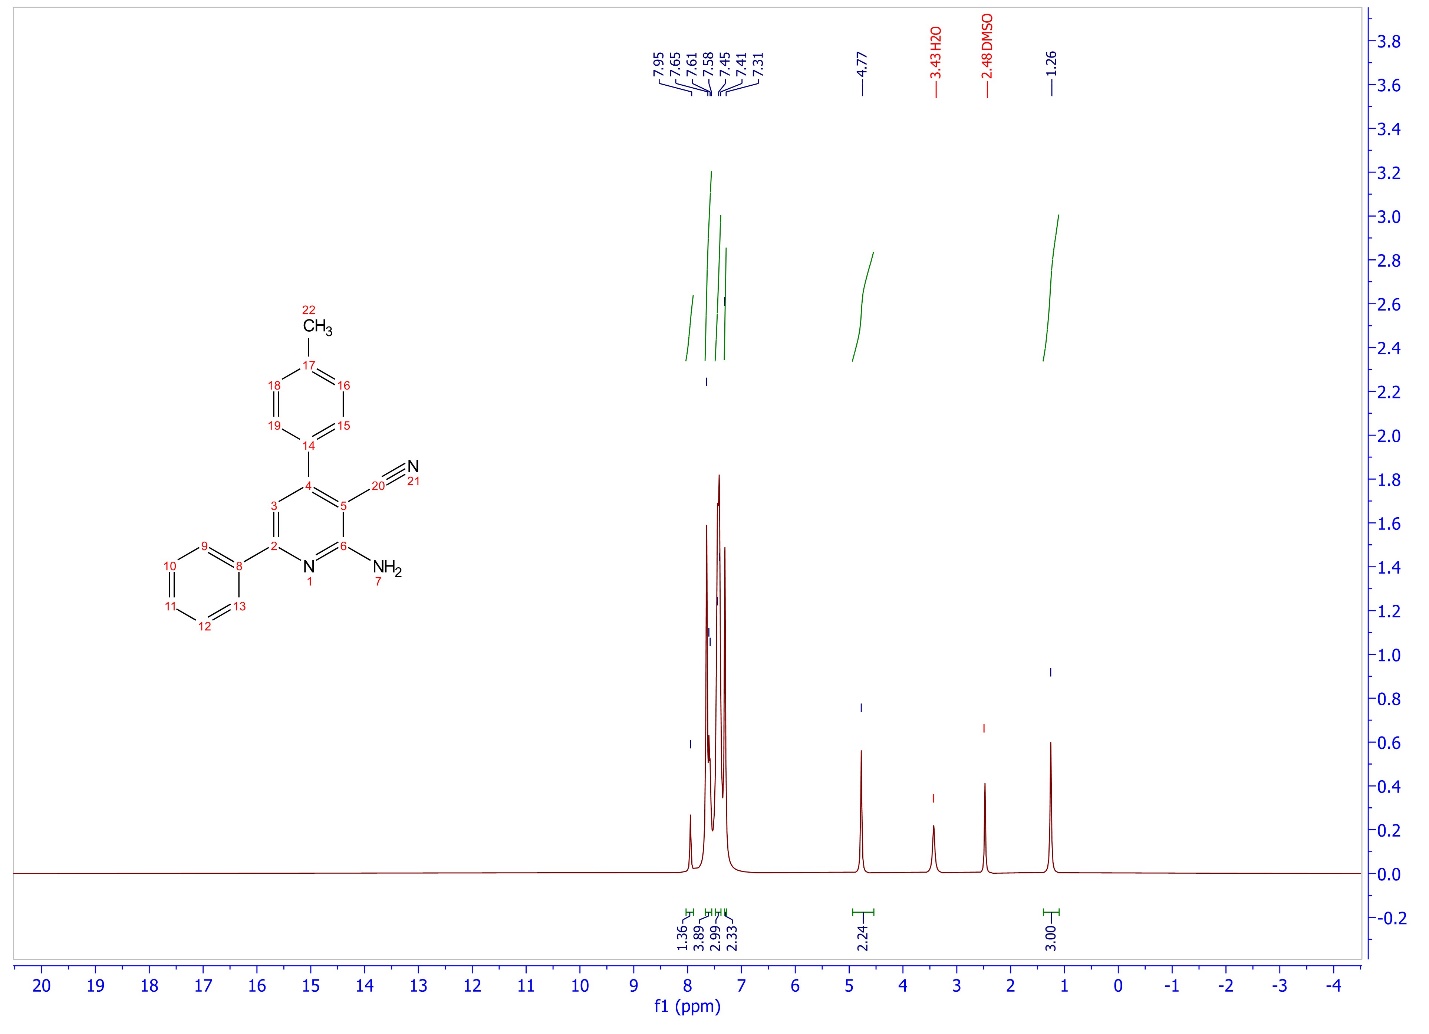
**

**Figure S4)** 2-amino-6-phenyl-4-(p-tolyl)nicotinonitrile

**2-Amino-6-phenyl-4-(p-tolyl)nicotinonitrile**:1H NMR (DMSO, 400 MHz): δ= 7.9 (s, 1H), 7.6 (m, 4H), 7.5 (m, 3H), 7.3 (m, 2H), 4.7 (s, 2H), 1.2 (s, 3H) ppm.
